# Supplementary material for: MicroRNA-based signatures impacting clinical course and biology of ovarian cancer: a miRNOmics study
Source: PubMed Central journal article supplement (PMC8276429; doi:10.1186/s40364-021-00289-6), 2021-07-13

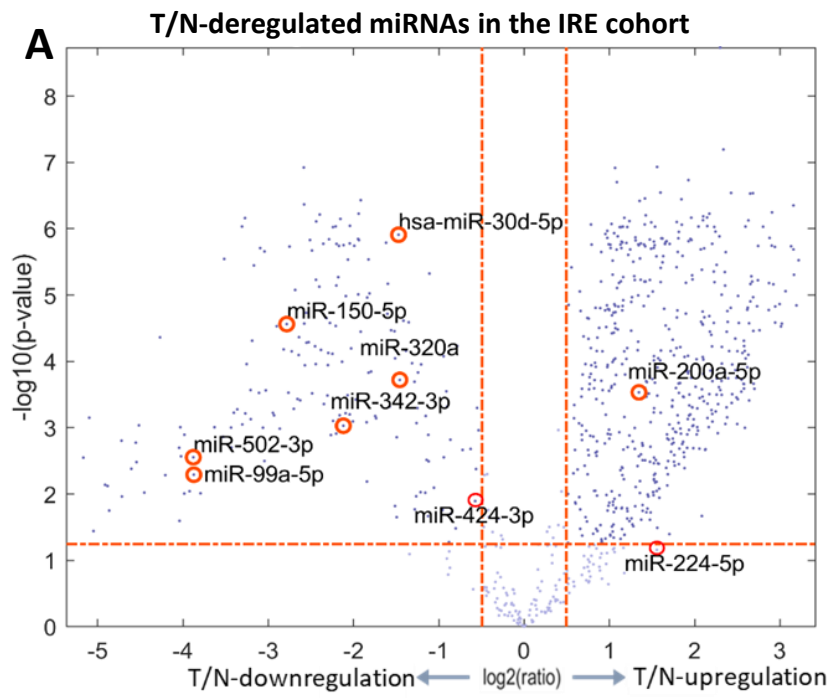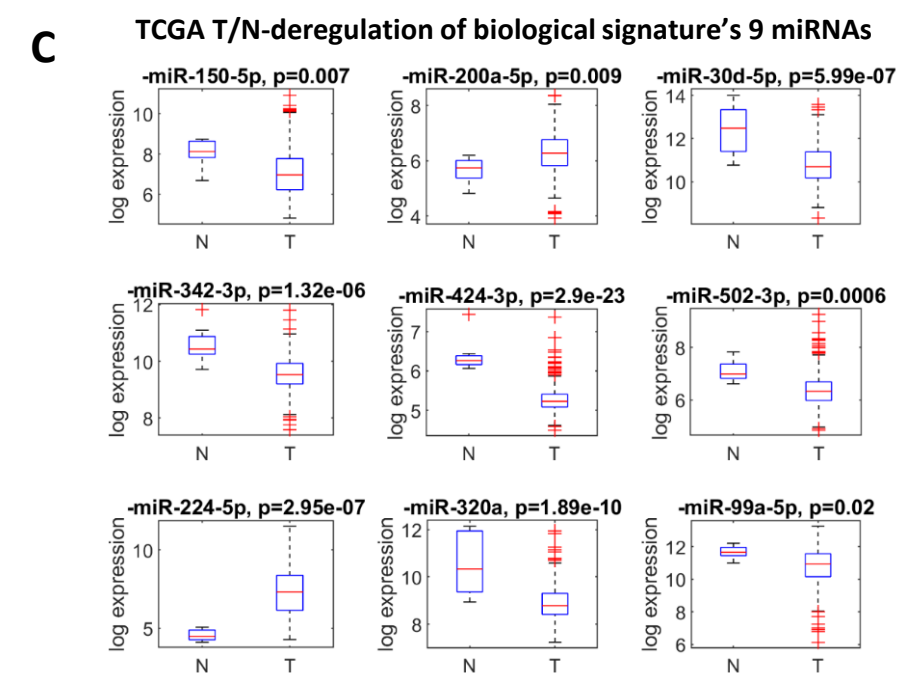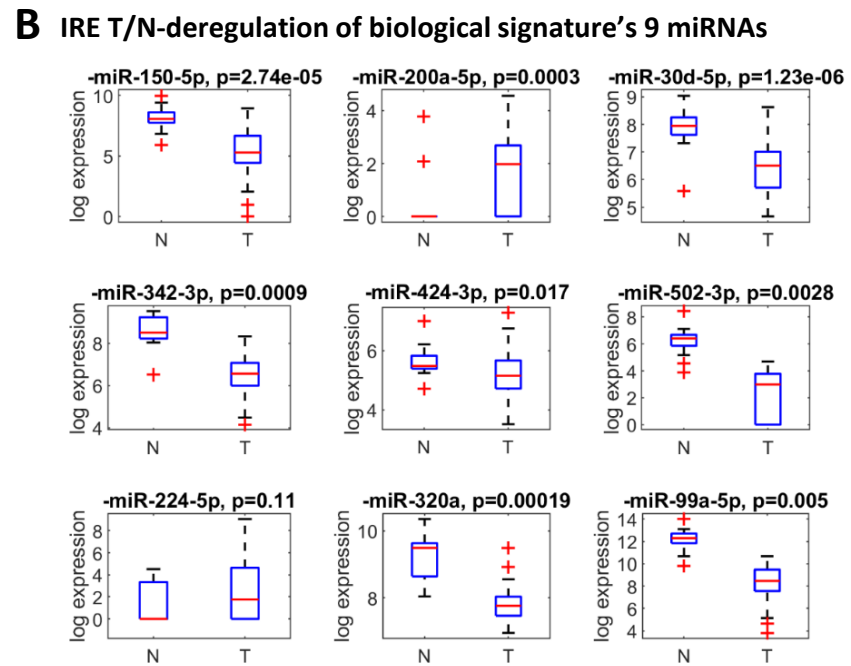

Supplement: 40364_2021_289_MOESM13_ESM.pdf [file 40364_2021_289_MOESM13_ESM.pdf]
